# Supplementary material for: Knowledge, Attitudes, and Hygienic Practices of Boiled Hypocotyls (Borassus aethiopum Mart) Vended in the Streets of Cotonou City and Its Outskirts, Benin
Source: Hindawi journal article supplement (doi:10.1155/2018/4825435), 2018-08-27
Supplement: f1 [file 4825435.f1.zip]

| Samples | Aerobic total<br>mesophilic flora | Yeast and<br>mould | Staphylo-<br>coccus | Total<br>Coliforms | Fecal<br>Coliforms | Lacto-<br>bacillus | Sulphito-<br>reductive<br>anaerobes |
|---------|-----------------------------------|--------------------|---------------------|--------------------|--------------------|--------------------|-------------------------------------|
|         | CFU/g                             |                    |                     |                    |                    |                    |                                     |
| S1      | 1913636,36                        | 650                | 12727,27            | 149090,91          | 141818,18          | 1577272,7          | 70                                  |
| S2      | 9090909,09                        | 500                | 60090,91            | 1800000            | 1672727,3          | 187727,27          | 10                                  |
| S3      | 13663636,36                       | 450                | 120909,09           | 2559090,9          | 1481818,2          | 3972727,3          | 0                                   |
| S4      | 1359090,91                        | 50                 | 2181,82             | 257272,73          | 31000              | 315454,55          | 0                                   |
| S5      | 1709090,91                        | 2300               | 3000                | 355909,09          | 231363,64          | 365909,09          | 55                                  |
| S6      | 2113636364                        | 550                | 14045,45            | 23272727           | 2259090,9          | 1,477E+09          | 0                                   |
| S7      | 913636,36                         | 386,36             | 545,45              | 954,55             | 450                | 768181,82          | 0                                   |
| S8      | 936363636,4                       | 6090,91            | 23863,64            | 273181,82          | 120909,09          | 904545455          | 0                                   |
| S9      | 237727,27                         | 2031,82            | 281,82              | 169545,45          | 81818,18           | 111363,64          | 0                                   |
| S10     | 1622727,27                        | 0                  | 350                 | 107272,73          | 72727,27           | 1177272,7          | 0                                   |
| S11     | 1363636,36                        | 1045,45            | 200                 | 123636,36          | 99545,45           | 1150000            | 0                                   |
| S12     | 265454,55                         | 0                  | 0                   | 56818,18           | 20000              | 187272,73          | 0                                   |
| S13     | 17909090,91                       | 550                | 1300                | 3313636,4          | 1304545,5          | 2018181,8          | 0                                   |
| S14     | 1800000                           | 150                | 950                 | 1659090,9          | 204545,45          | 272727,27          | 10                                  |
| S15     | 1845454,55                        | 818,18             | 6227,27             | 1318181,8          | 281818,18          | 325454,55          | 0                                   |
| S16     | 3559090,91                        | 1045,45            | 125000              | 1186363,6          | 886363,64          | 2327272,7          | 0                                   |
| S17     | 1536363,64                        | 100                | 61636,36            | 454545,45          | 204545,45          | 293636,36          | 0                                   |
| S18     | 3445454,55                        | 100                | 1136,36             | 3018181,8          | 1804545,5          | 239090,91          | 20                                  |
| S19     | 1572727,27                        | 1272,73            | 1600                | 183181,82          | 105909,09          | 267727,27          | 5                                   |
| S20     | 1272727,27                        | 2000               | 1700                | 112727,27          | 86818,18           | 278636,36          | 0                                   |
| S21     | 2200000                           | 200                | 11818,18            | 326363,64          | 106818,18          | 1095454,6          | 0                                   |
| S22     | 895454,55                         | 809,09             | 0                   | 125909,09          | 33863,64           | 272727,27          | 0                                   |
| S23     | 190909,09                         | 190909,09          | 200                 | 85454,55           | 33181,82           | 30000              | 0                                   |
| S24     | 331818,18                         | 2318,18            | 1363,64             | 227272,73          | 95454,55           | 86363,64           | 0                                   |
| S25     | 514259,48                         | 70,71              | 0                   | 1359090,9          | 731818,18          | 2454545,5          | 35                                  |
| S26     | 8681818,18                        | 227,27             | 5181,82             | 359090,91          | 240909,09          | 5954545,5          | 0                                   |
| S27     | 18590909,09                       | 50                 | 668,18              | 12181818           | 9636363,6          | 2009090,9          | 0                                   |
| S28     | 477272,73                         | 750                | 250                 | 286363,64          | 109090,91          | 24545,45           | 0                                   |
| S29     | 995454,55                         | 200                | 804,55              | 131818,18          | 92727,27           | 572727,27          | 0                                   |
| S30     | 9136363,64                        | 200                | 863,64              | 65909,09           | 20000              | 8409090,9          | 0                                   |
| S31     | 1236363,64                        | 100                | 1000                | 59545,45           | 45909,09           | 936363,64          | 0                                   |
| S32     | 2445454,55                        | 0                  | 140,91              | 136818,18          | 109090,91          | 1936363,6          | 0                                   |
| S33     | 945454,55                         | 0                  | 1363,64             | 56363,64           | 29545,45           | 659090,91          | 0                                   |
| S34     | 40909,09                          | 572,73             | 568,18              | 9954,55            | 1500               | 18181,82           | 0                                   |
| S35     | 277272,73                         | 0                  | 0                   | 19090,91           | 8045,45            | 195454,55          | 0                                   |
| S36     | 1309090,91                        | 377,27             | 1136,36             | 144090,91          | 95909,09           | 963636,36          | 0                                   |
| S37     | 1313636,36                        | 590,91             | 1863,64             | 110909,09          | 87272,73           | 981818,18          | 0                                   |
| S38     | 1272727,27                        | 1272,73            | 909,09              | 142727,27          | 87272,73           | 236363,64          | 0                                   |
| S39     | 1472727,27                        | 1636,36            | 2045,45             | 265909,09          | 220000             | 269545,45          | 0                                   |
| S40     | 1159090,91                        | 286,36             | 7727,27             | 422727,27          | 180909,09          | 257272,73          | 0                                   |
| S41     | 118181,82                         | 472,73             | 768,18              | 11818,18           | 6818,18            | 213636,36          | 0                                   |
| S42     | 500000                            | 0                  | 0                   | 12727,27           | 5318,18            | 18181,82           | 0                                   |
| S43     | 8454545,46                        | 954,55             | 1190,91             | 3018181,8          | 1786363,6          | 1886363,6          | 0                                   |
| S44     | 90454545,45                       | 3454,55            | 18136,36            | 668181,82          | 200000             | 89545455           | 0                                   |
| S45     | 918181,82                         | 650                | 2350                | 95000              | 59090,91           | 299090,91          | 0                                   |
| S46     | 1118181,82                        | 150                | 200                 | 130909,09          | 88181,82           | 690909,09          | 0                                   |
| S47     | 1963636,36                        | 2000               | 1772,73             | 128181,82          | 90000              | 1222727,3          | 0                                   |
| S48     | 1009090,91                        | 1045,45            | 550                 | 70000              | 47727,27           | 936363,64          | 0                                   |
| S49     | 281818,18                         | 227,27             | 1000                | 11045,45           | 5909,09            | 227272,73          | 0                                   |
| S50     | 1286363,64                        | 1045,45            | 954,55              | 99545,45           | 79090,91           | 1077272,7          | 0                                   |
| S51     | 9136363,64                        | 200                | 863,64              | 65909,09           | 20000              | 8409090,9          | 0                                   |
| S52     | 1236363,64                        | 100                | 1000                | 59545,45           | 45909,09           | 936363,64          | 0                                   |
| S53     | 2445454,55                        | 0                  | 140,91              | 136818,18          | 109090,91          | 1936363,6          | 0                                   |
| S54     | 945454,55                         | 0                  | 1363,64             | 56363,64           | 29545,45           | 659090,91          | 0                                   |

|      |             |           |           |           |           |           |    |
|------|-------------|-----------|-----------|-----------|-----------|-----------|----|
| S55  | 40909,09    | 572,73    | 568,18    | 9954,55   | 1500      | 18181,82  | 0  |
| S56  | 277272,73   | 0         | 0         | 19090,91  | 8045,45   | 195454,55 | 0  |
| S57  | 1309090,91  | 377,27    | 1136,36   | 144090,91 | 95909,09  | 963636,36 | 0  |
| S58  | 1313636,36  | 590,91    | 1863,64   | 110909,09 | 87272,73  | 981818,18 | 0  |
| S59  | 1272727,27  | 1272,73   | 909,09    | 142727,27 | 87272,73  | 236363,64 | 0  |
| S60  | 1472727,27  | 1636,36   | 2045,45   | 265909,09 | 220000    | 269545,45 | 0  |
| S61  | 1159090,91  | 286,36    | 7727,27   | 422727,27 | 180909,09 | 257272,73 | 0  |
| S62  | 1118181,82  | 150       | 200       | 130909,09 | 88181,82  | 690909,09 | 0  |
| S63  | 1963636,36  | 2000      | 1772,73   | 128181,82 | 90000     | 1222727,3 | 0  |
| S64  | 1009090,91  | 1045,45   | 550       | 70000     | 47727,27  | 936363,64 | 0  |
| S65  | 281818,18   | 227,27    | 1000      | 11045,45  | 5909,09   | 227272,73 | 0  |
| S66  | 1286363,64  | 1045,45   | 954,55    | 99545,45  | 79090,91  | 1077272,7 | 0  |
| S67  | 1536363,64  | 100       | 61636,36  | 454545,45 | 204545,45 | 293636,36 | 0  |
| S68  | 3445454,55  | 100       | 1136,36   | 3018181,8 | 1804545,5 | 239090,91 | 20 |
| S69  | 1572727,27  | 1272,73   | 1600      | 183181,82 | 105909,09 | 267727,27 | 5  |
| S70  | 1272727,27  | 2000      | 1700      | 112727,27 | 86818,18  | 278636,36 | 0  |
| S71  | 2200000     | 200       | 11818,18  | 326363,64 | 106818,18 | 1095454,6 | 0  |
| S72  | 895454,55   | 809,09    | 0         | 125909,09 | 33863,64  | 272727,27 | 0  |
| S73  | 190909,09   | 190909,09 | 200       | 85454,55  | 33181,82  | 30000     | 0  |
| S74  | 331818,18   | 2318,18   | 1363,64   | 227272,73 | 95454,55  | 86363,64  | 0  |
| S75  | 514259,48   | 70,71     | 0         | 1359090,9 | 731818,18 | 2454545,5 | 35 |
| S76  | 8681818,18  | 227,27    | 5181,82   | 359090,91 | 240909,09 | 5954545,5 | 0  |
| S77  | 18590909,09 | 50        | 668,18    | 12181818  | 9636363,6 | 2009090,9 | 0  |
| S78  | 477272,73   | 750       | 250       | 286363,64 | 109090,91 | 24545,45  | 0  |
| S79  | 995454,55   | 200       | 804,55    | 131818,18 | 92727,27  | 572727,27 | 0  |
| S80  | 118181,82   | 472,73    | 768,18    | 11818,18  | 6818,18   | 213636,36 | 0  |
| S81  | 500000      | 0         | 0         | 12727,27  | 5318,18   | 18181,82  | 0  |
| S82  | 8454545,46  | 954,55    | 1190,91   | 3018181,8 | 1786363,6 | 1886363,6 | 0  |
| S83  | 90454545,45 | 3454,55   | 18136,36  | 668181,82 | 200000    | 89545455  | 0  |
| S84  | 918181,82   | 650       | 2350      | 95000     | 59090,91  | 299090,91 | 0  |
| S85  | 17909090,91 | 550       | 1300      | 3313636,4 | 1304545,5 | 2018181,8 | 0  |
| S86  | 1800000     | 150       | 950       | 1659090,9 | 204545,45 | 272727,27 | 10 |
| S87  | 1845454,55  | 818,18    | 6227,27   | 1318181,8 | 281818,18 | 325454,55 | 0  |
| S88  | 3559090,91  | 1045,45   | 125000    | 1186363,6 | 886363,64 | 2327272,7 | 0  |
| S89  | 1536363,64  | 100       | 61636,36  | 454545,45 | 204545,45 | 293636,36 | 0  |
| S90  | 3445454,55  | 100       | 1136,36   | 3018181,8 | 1804545,5 | 239090,91 | 20 |
| S91  | 1572727,27  | 1272,73   | 1600      | 183181,82 | 105909,09 | 267727,27 | 5  |
| S92  | 1272727,27  | 2000      | 1700      | 112727,27 | 86818,18  | 278636,36 | 0  |
| S93  | 2200000     | 200       | 11818,18  | 326363,64 | 106818,18 | 1095454,6 | 0  |
| S94  | 895454,55   | 809,09    | 0         | 125909,09 | 33863,64  | 272727,27 | 0  |
| S95  | 190909,09   | 190909,09 | 200       | 85454,55  | 33181,82  | 30000     | 0  |
| S96  | 331818,18   | 2318,18   | 1363,64   | 227272,73 | 95454,55  | 86363,64  | 0  |
| S97  | 514259,48   | 70,71     | 0         | 1359090,9 | 731818,18 | 2454545,5 | 35 |
| S98  | 1622727,27  | 0         | 350       | 107272,73 | 72727,27  | 1177272,7 | 0  |
| S99  | 1363636,36  | 1045,45   | 200       | 123636,36 | 99545,45  | 1150000   | 0  |
| S100 | 265454,55   | 0         | 0         | 56818,18  | 20000     | 187272,73 | 0  |
| S101 | 17909090,91 | 550       | 1300      | 3313636,4 | 1304545,5 | 2018181,8 | 0  |
| S102 | 1800000     | 150       | 950       | 1659090,9 | 204545,45 | 272727,27 | 10 |
| S103 | 1845454,55  | 818,18    | 6227,27   | 1318181,8 | 281818,18 | 325454,55 | 0  |
| S104 | 3559090,91  | 1045,45   | 125000    | 1186363,6 | 886363,64 | 2327272,7 | 0  |
| S105 | 1913636,36  | 650       | 12727,27  | 149090,91 | 141818,18 | 1577272,7 | 70 |
| S106 | 9090909,09  | 500       | 60090,91  | 1800000   | 1672727,3 | 187727,27 | 10 |
| S107 | 13663636,36 | 450       | 120909,09 | 2559090,9 | 1481818,2 | 3972727,3 | 0  |
| S108 | 1359090,91  | 50        | 2181,82   | 257272,73 | 31000     | 315454,55 | 0  |
| S109 | 1709090,91  | 2300      | 3000      | 355909,09 | 231363,64 | 365909,09 | 55 |
| S110 | 2113636364  | 550       | 14045,45  | 23272727  | 2259090,9 | 1,477E+09 | 0  |
| S111 | 913636,36   | 386,36    | 545,45    | 954,55    | 450       | 768181,82 | 0  |
| S112 | 936363636,4 | 6090,91   | 23863,64  | 273181,82 | 120909,09 | 904545455 | 0  |
| S113 | 237727,27   | 2031,82   | 281,82    | 169545,45 | 81818,18  | 111363,64 | 0  |

|      |             |           |           |           |           |           |    |
|------|-------------|-----------|-----------|-----------|-----------|-----------|----|
| S114 | 1622727,27  | 0         | 350       | 107272,73 | 72727,27  | 1177272,7 | 0  |
| S115 | 1913636,36  | 650       | 12727,27  | 149090,91 | 141818,18 | 1577272,7 | 70 |
| S116 | 9090909,09  | 500       | 60090,91  | 1800000   | 1672727,3 | 187727,27 | 10 |
| S117 | 13663636,36 | 450       | 120909,09 | 2559090,9 | 1481818,2 | 3972727,3 | 0  |
| S118 | 1359090,91  | 50        | 2181,82   | 257272,73 | 31000     | 315454,55 | 0  |
| S119 | 1709090,91  | 2300      | 3000      | 355909,09 | 231363,64 | 365909,09 | 55 |
| S120 | 2113636364  | 550       | 14045,45  | 23272727  | 2259090,9 | 1,477E+09 | 0  |
| S121 | 913636,36   | 386,36    | 545,45    | 954,55    | 450       | 768181,82 | 0  |
| S122 | 936363636,4 | 6090,91   | 23863,64  | 273181,82 | 120909,09 | 904545455 | 0  |
| S123 | 237727,27   | 2031,82   | 281,82    | 169545,45 | 81818,18  | 111363,64 | 0  |
| S124 | 2445454,55  | 0         | 140,91    | 136818,18 | 109090,91 | 1936363,6 | 0  |
| S125 | 945454,55   | 0         | 1363,64   | 56363,64  | 29545,45  | 659090,91 | 0  |
| S126 | 1622727,27  | 0         | 350       | 107272,73 | 72727,27  | 1177272,7 | 0  |
| S127 | 1363636,36  | 1045,45   | 200       | 123636,36 | 99545,45  | 1150000   | 0  |
| S128 | 265454,55   | 0         | 0         | 56818,18  | 20000     | 187272,73 | 0  |
| S129 | 17909090,91 | 550       | 1300      | 3313636,4 | 1304545,5 | 2018181,8 | 0  |
| S130 | 1800000     | 150       | 950       | 1659090,9 | 204545,45 | 272727,27 | 10 |
| S131 | 1845454,55  | 818,18    | 6227,27   | 1318181,8 | 281818,18 | 325454,55 | 0  |
| S132 | 3559090,91  | 1045,45   | 125000    | 1186363,6 | 886363,64 | 2327272,7 | 0  |
| S133 | 1536363,64  | 100       | 61636,36  | 454545,45 | 204545,45 | 293636,36 | 0  |
| S134 | 3445454,55  | 100       | 1136,36   | 3018181,8 | 1804545,5 | 239090,91 | 20 |
| S135 | 1572727,27  | 1272,73   | 1600      | 183181,82 | 105909,09 | 267727,27 | 5  |
| S136 | 1272727,27  | 2000      | 1700      | 112727,27 | 86818,18  | 278636,36 | 0  |
| S137 | 2200000     | 200       | 11818,18  | 326363,64 | 106818,18 | 1095454,6 | 0  |
| S138 | 895454,55   | 809,09    | 0         | 125909,09 | 33863,64  | 272727,27 | 0  |
| S139 | 190909,09   | 190909,09 | 200       | 85454,55  | 33181,82  | 30000     | 0  |
| S140 | 331818,18   | 2318,18   | 1363,64   | 227272,73 | 95454,55  | 86363,64  | 0  |
| S141 | 514259,48   | 70,71     | 0         | 1359090,9 | 731818,18 | 2454545,5 | 35 |
| S142 | 8681818,18  | 227,27    | 5181,82   | 359090,91 | 240909,09 | 5954545,5 | 0  |
| S143 | 18590909,09 | 50        | 668,18    | 12181818  | 9636363,6 | 2009090,9 | 0  |
| S144 | 477272,73   | 750       | 250       | 286363,64 | 109090,91 | 24545,45  | 0  |
| S145 | 995454,55   | 200       | 804,55    | 131818,18 | 92727,27  | 572727,27 | 0  |
| S146 | 9136363,64  | 200       | 863,64    | 65909,09  | 20000     | 8409090,9 | 0  |
| S147 | 1236363,64  | 100       | 1000      | 59545,45  | 45909,09  | 936363,64 | 0  |
| S148 | 2445454,55  | 0         | 140,91    | 136818,18 | 109090,91 | 1936363,6 | 0  |
| S149 | 945454,55   | 0         | 1363,64   | 56363,64  | 29545,45  | 659090,91 | 0  |
| S150 | 40909,09    | 572,73    | 568,18    | 9954,55   | 1500      | 18181,82  | 0  |
| S151 | 277272,73   | 0         | 0         | 19090,91  | 8045,45   | 195454,55 | 0  |
| S152 | 1309090,91  | 377,27    | 1136,36   | 144090,91 | 95909,09  | 963636,36 | 0  |
| S153 | 1313636,36  | 590,91    | 1863,64   | 110909,09 | 87272,73  | 981818,18 | 0  |
| S154 | 1272727,27  | 1272,73   | 909,09    | 142727,27 | 87272,73  | 236363,64 | 0  |
| S155 | 1472727,27  | 1636,36   | 2045,45   | 265909,09 | 220000    | 269545,45 | 0  |
| S156 | 1159090,91  | 286,36    | 7727,27   | 422727,27 | 180909,09 | 257272,73 | 0  |
| S157 | 118181,82   | 472,73    | 768,18    | 11818,18  | 6818,18   | 213636,36 | 0  |
| S158 | 500000      | 0         | 0         | 12727,27  | 5318,18   | 18181,82  | 0  |
| S159 | 8454545,46  | 954,55    | 1190,91   | 3018181,8 | 1786363,6 | 1886363,6 | 0  |
| S160 | 90454545,45 | 3454,55   | 18136,36  | 668181,82 | 200000    | 89545455  | 0  |
| S161 | 918181,82   | 650       | 2350      | 95000     | 59090,91  | 299090,91 | 0  |
| S162 | 1118181,82  | 150       | 200       | 130909,09 | 88181,82  | 690909,09 | 0  |
| S163 | 1963636,36  | 2000      | 1772,73   | 128181,82 | 90000     | 1222727,3 | 0  |
| S164 | 40909,09    | 572,73    | 568,18    | 9954,55   | 1500      | 18181,82  | 0  |
| S165 | 277272,73   | 0         | 0         | 19090,91  | 8045,45   | 195454,55 | 0  |
| S166 | 1309090,91  | 377,27    | 1136,36   | 144090,91 | 95909,09  | 963636,36 | 0  |
| S167 | 1313636,36  | 590,91    | 1863,64   | 110909,09 | 87272,73  | 981818,18 | 0  |
| S168 | 913636,36   | 386,36    | 545,45    | 954,55    | 450       | 768181,82 | 0  |
| S169 | 936363636,4 | 6090,91   | 23863,64  | 273181,82 | 120909,09 | 904545455 | 0  |
| S170 | 237727,27   | 2031,82   | 281,82    | 169545,45 | 81818,18  | 111363,64 | 0  |
| S171 | 1009090,91  | 1045,45   | 550       | 70000     | 47727,27  | 936363,64 | 0  |
| S172 | 281818,18   | 227,27    | 1000      | 11045,45  | 5909,09   | 227272,73 | 0  |

|      |             |         |           |           |           |           |    |
|------|-------------|---------|-----------|-----------|-----------|-----------|----|
| S173 | 1286363,64  | 1045,45 | 954,55    | 99545,45  | 79090,91  | 1077272,7 | 0  |
| S174 | 1272727,27  | 1272,73 | 909,09    | 142727,27 | 87272,73  | 236363,64 | 0  |
| S175 | 1472727,27  | 1636,36 | 2045,45   | 265909,09 | 220000    | 269545,45 | 0  |
| S176 | 1159090,91  | 286,36  | 7727,27   | 422727,27 | 180909,09 | 257272,73 | 0  |
| S177 | 118181,82   | 472,73  | 768,18    | 11818,18  | 6818,18   | 213636,36 | 0  |
| S178 | 500000      | 0       | 0         | 12727,27  | 5318,18   | 18181,82  | 0  |
| S179 | 8454545,46  | 954,55  | 1190,91   | 3018181,8 | 1786363,6 | 1886363,6 | 0  |
| S180 | 90454545,45 | 3454,55 | 18136,36  | 668181,82 | 200000    | 89545455  | 0  |
| S181 | 477272,73   | 750     | 250       | 286363,64 | 109090,91 | 24545,45  | 0  |
| S182 | 995454,55   | 200     | 804,55    | 131818,18 | 92727,27  | 572727,27 | 0  |
| S183 | 9136363,64  | 200     | 863,64    | 65909,09  | 20000     | 8409090,9 | 0  |
| S184 | 1236363,64  | 100     | 1000      | 59545,45  | 45909,09  | 936363,64 | 0  |
| S185 | 1363636,36  | 1045,45 | 200       | 123636,36 | 99545,45  | 1150000   | 0  |
| S186 | 265454,55   | 0       | 0         | 56818,18  | 20000     | 187272,73 | 0  |
| S187 | 8681818,18  | 227,27  | 5181,82   | 359090,91 | 240909,09 | 5954545,5 | 0  |
| S188 | 18590909,09 | 50      | 668,18    | 12181818  | 9636363,6 | 2009090,9 | 0  |
| S189 | 918181,82   | 650     | 2350      | 95000     | 59090,91  | 299090,91 | 0  |
| S190 | 1118181,82  | 150     | 200       | 130909,09 | 88181,82  | 690909,09 | 0  |
| S191 | 1963636,36  | 2000    | 1772,73   | 128181,82 | 90000     | 1222727,3 | 0  |
| S192 | 1009090,91  | 1045,45 | 550       | 70000     | 47727,27  | 936363,64 | 0  |
| S193 | 281818,18   | 227,27  | 1000      | 11045,45  | 5909,09   | 227272,73 | 0  |
| S194 | 1286363,64  | 1045,45 | 954,55    | 99545,45  | 79090,91  | 1077272,7 | 0  |
| S195 | 1913636,36  | 650     | 12727,27  | 149090,91 | 141818,18 | 1577272,7 | 70 |
| S196 | 9090909,09  | 500     | 60090,91  | 1800000   | 1672727,3 | 187727,27 | 10 |
| S197 | 13663636,36 | 450     | 120909,09 | 2559090,9 | 1481818,2 | 3972727,3 | 0  |
| S198 | 1359090,91  | 50      | 2181,82   | 257272,73 | 31000     | 315454,55 | 0  |
| S199 | 1709090,91  | 2300    | 3000      | 355909,09 | 231363,64 | 365909,09 | 55 |
| S200 | 2113636364  | 550     | 14045,45  | 23272727  | 2259090,9 | 1,477E+09 | 0  |
