# Supplementary material for: Knowledge, Attitudes, and Hygienic Practices of Boiled Hypocotyls (Borassus aethiopum Mart) Vended in the Streets of Cotonou City and Its Outskirts, Benin
Source: Hindawi journal article supplement (doi:10.1155/2018/4825435), 2018-08-27
Supplement: f1 [file 4825435.f1.zip]

Treatment of socio-economic data collected

| Questions              | a              | b      | c      | d   | e   | f      | g      | h     | i  | j |
|------------------------|----------------|--------|--------|-----|-----|--------|--------|-------|----|---|
| Q1                     | 300            | 0      |        |     |     |        |        |       |    |   |
| Q2                     | 0              | 15     |        | 40  | 60  | 75     | 55     | 35    | 20 | 0 |
| Q3                     | 75             | 0      | 5      | 225 |     |        |        |       |    |   |
| Q4                     | 0              | 300    | 0      | 0   |     |        |        |       |    |   |
| Q5                     | 5              | 295    |        |     |     |        |        |       |    |   |
| Q6                     | 295            | 5      |        |     |     |        |        |       |    |   |
| Q7                     | 295            | 5      |        |     |     |        |        |       |    |   |
| Q8                     | 270            | 30     |        |     |     |        |        |       |    |   |
| Q9                     | 115            | 185    | 140    | 45  |     |        |        |       |    |   |
| Q10                    | 295            | 5      |        |     |     |        |        |       |    |   |
| Q11                    | 290            | 10     |        |     |     |        |        |       |    |   |
| Q12                    | 300            | 0      |        |     |     |        |        |       |    |   |
| Q13                    | 115            | 185    | 0      |     |     |        |        |       |    |   |
| Q14                    | 10             | 30     | 0      | 255 | 5   |        |        |       |    |   |
| Q15                    | 285            | 15     |        |     |     |        |        |       |    |   |
| Q16                    | 300            | 0      |        |     |     |        |        |       |    |   |
| Q17                    | 300            | 0      |        |     |     |        |        |       |    |   |
| Q18                    | 15             | 35     | 20     | 230 |     |        |        |       |    |   |
| Q19                    | 55             | 0      |        |     |     |        |        |       |    |   |
| Q20                    | 0              | 300    |        |     |     |        |        |       |    |   |
| Q21                    | 0              | 55     |        |     |     |        |        |       |    |   |
| Q22                    | 55             | 245    |        |     |     |        |        |       |    |   |
| Q23                    | 0              | 15     | 220    | 20  | 0   | 45     |        |       |    |   |
| Q24                    | 165            | 220    | 20     | 5   |     |        |        |       |    |   |
| Q25                    | 220            | 80     |        |     |     |        |        |       |    |   |
|                        |                |        |        |     |     |        |        |       |    |   |
| Q1 : Sex               | 100% are women |        |        |     |     |        |        |       |    |   |
| Q2 : Age               | 0%             | 5%     | 13,33% | 20% | 25% | 18,33% | 11,66% | 6,66% | 0% |   |
| Q3: Level of education | 25%            | 23,33% | 1,66%  | 75% |     |        |        |       |    |   |
| Q4: Kind of activity   | 1,66%          | 98,33% | 0%     | 0%  |     |        |        |       |    |   |
| Q5: Production         | 1,66%          | 98,33% |        |     |     |        |        |       |    |   |
| Q6: Procurement        | 98,33%         | 1,66%  |        |     |     |        |        |       |    |   |
| Q7 : Manufacturing     | 98,33%         | 1,66%  |        |     |     |        |        |       |    |   |
| Q8: Material           | 90%            | 10%    |        |     |     |        |        |       |    |   |
| Q9: Chicken            | 38,33%         | 61,66% | 46,66% | 15% |     |        |        |       |    |   |
| Q10 : Washing          | 98,33%         | 1,66%  |        |     |     |        |        |       |    |   |

|                                                   |                  |            |                   |        |                  |                       |  |  |        |     |
|---------------------------------------------------|------------------|------------|-------------------|--------|------------------|-----------------------|--|--|--------|-----|
| Q11: Hands washing                                | 96,66%           | 3,33%      |                   |        |                  |                       |  |  |        |     |
| Q12:Hygiene rule                                  | 100%             | 0%         |                   |        |                  |                       |  |  |        |     |
| Q13: Water used                                   | 38,33%           | 70%        | 0%                |        |                  |                       |  |  |        |     |
| Q14: Water treatment                              | 3,33%            | 10%        | 0%                | 85%    | 1,66%            |                       |  |  |        |     |
| Q15: Frequency of cleaning                        | 95%              | 5%         |                   |        |                  |                       |  |  |        |     |
| Q16 : Existence of microorganisms                 | 100%             | 0%         |                   |        |                  |                       |  |  |        |     |
| Q17: Microorganisms and deseases                  | 100%             | 0%         |                   |        |                  |                       |  |  |        |     |
| Q 18 : Pathways of transmission of microorganisms | 5%               | 11,66%     | 6,66%             | 76,66% |                  |                       |  |  |        |     |
| Q 19: Hygiene of the place of selling             | 18,33%           | 0%         |                   |        |                  |                       |  |  |        |     |
| Q20: Hygiene of the vendor                        | 0%               | 100%       |                   |        |                  |                       |  |  |        |     |
| Q21: Presence of junk on the cooking site         | 0%               | 100%       |                   |        |                  |                       |  |  |        |     |
| Q22: Seller type                                  | 18,33%           | 81,66%     |                   |        |                  |                       |  |  |        |     |
| Q 23: Tubers packaging                            | 0%               | 5%         | 73,33%            | 6,66%  | 0%               | 15%                   |  |  |        |     |
| Q 24: Treatment of remains and conservation       | 55%              | 73%        | 3,33%             | 1,66%  |                  |                       |  |  |        |     |
| Q 25: Diagram                                     | 73,33%           | 26,66%     |                   |        |                  |                       |  |  |        |     |
|                                                   |                  |            |                   |        |                  |                       |  |  |        |     |
|                                                   |                  |            |                   |        |                  |                       |  |  |        |     |
|                                                   | <b>Effective</b> | <b>Age</b> | <b>Percentage</b> |        |                  | <b>Literate</b>       |  |  | 38,33% | 70% |
|                                                   | 0%               | < 15       | 0                 |        |                  | 23,33%                |  |  |        |     |
|                                                   | 500%             | 15-20      | 5                 |        |                  | 1,66%                 |  |  |        |     |
|                                                   | 13,33%           | 20-25      | 13,33             | 20     |                  | No literate           |  |  |        |     |
|                                                   | 20%              | 25-30      | 20                | 25     |                  | 75%                   |  |  |        |     |
|                                                   | 25%              | 30-35      | 25                | 30     |                  | Transmission pathways |  |  |        |     |
|                                                   | 18,33%           | 35-40      | 18,33             | 35     | unsuitable water | 5%                    |  |  |        |     |
|                                                   | 11,66%           | 40-45      | 11,66             | 40     |                  |                       |  |  |        |     |
|                                                   | 6,66%            | 45-50      | 6,66              | 45     | Dirty hands      | 11,66%                |  |  |        |     |
|                                                   | 0%               | >50        | 0                 | 50     |                  |                       |  |  |        |     |
|                                                   |                  |            |                   |        | Dirty utensils   | 6,66%                 |  |  |        |     |
