# Supplementary material for: Knowledge, Attitudes, and Hygienic Practices of Boiled Hypocotyls (Borassus aethiopum Mart) Vended in the Streets of Cotonou City and Its Outskirts, Benin
Source: Biomed Res Int. 2018 Aug 27;2018:4825435. doi: 10.1155/2018/4825435 (PMC6129848; doi:10.1155/2018/4825435)
Supplement: Supplementary Materials — The data used to support the findings of this study are included within the supplementary files. This section includes the survey sheet, the examination of survey cards, and the results of microbiological analyzes. [file 4825435.f1.zip]

Archive with 4 entries (3 files):
- 4825435.f1/
- 4825435.f1/Examination of survey cards.pdf
- 4825435.f1/Results of Microbiology Analyzes.pdf
- 4825435.f1/Survey Sheet.pdf
